# Supplementary material
Source: PubMed Central journal article supplement (PMC2931812)

**Supplementary Table S1.** Primers for the analysis of *Dhcr24* expression and quantitative real-time PCR.

| Gene                              | GeneBank ID | No.                                  | Primer                                                                                                      | Sequence 5'→3'                                                                                                                                                                                     |
|-----------------------------------|-------------|--------------------------------------|-------------------------------------------------------------------------------------------------------------|----------------------------------------------------------------------------------------------------------------------------------------------------------------------------------------------------|
| <b><i>Dhcr24</i> EXPRESSION</b>   |             |                                      |                                                                                                             |                                                                                                                                                                                                    |
| <i>Dhcr24</i>                     | NM_053272.1 | 1<br>2<br>3<br>4<br>5<br>6<br>7<br>8 | ED24RSEN<br>ED24RANT<br>24RRSEN<br>ED24RANT 2.1<br>ED24RANT3.1<br>ED24RANT4.1<br>ED24RANT5.1<br>ED24RANT7.1 | CATCCCTTTTCGGCAACAACCC<br>GGAGTGTGCACGGGTTCCAAAT<br>CTGCCGCTCTCGTTATCTTCG<br>CTTGGTGTCCACCTCCAGGA<br>TCATCAAGCTCAGGCAACAC<br>CCAGGATCAGCTCGTAGGCAG<br>AAGTGGTTCTCCAGCCGCTG<br>CGTGGTGCTGCTCGTACAGC |
| <i>Gapdh</i>                      | NM_008084   | 9<br>10                              | GAPDHSEN<br>GAPDHANT                                                                                        | CTCTGGAAAGCTGTGGCGTGAT<br>AGTCAAGGCCGAGAATGGGAAG                                                                                                                                                   |
| <b>QUANTITATIVE REAL-TIME PCR</b> |             |                                      |                                                                                                             |                                                                                                                                                                                                    |
| <i>Hmgcr</i>                      | NM_008255   | 11<br>12                             | hmgRED Fw<br>hmgRED Rev                                                                                     | CTTGTGGAATGCCTTGTGATTG<br>AGCCGAAGCAGCACATGAT                                                                                                                                                      |
| <i>Ldlr</i>                       | NM_010700   | 13<br>14                             | LDLR Fw<br>LDLR Rev                                                                                         | AGGCTGTGGGCTCCATAGG<br>TGCGGTCCAGGGTCATCT                                                                                                                                                          |
| <i>Insig1</i>                     | NM_153526.2 | 15<br>16                             | Insig1 Fw<br>Insig1 Rev                                                                                     | TCACAGTGACTGAGCTTCAGCA<br>TCATCTTCATCACACCCAGGAC                                                                                                                                                   |
| <i>Srebf1c</i>                    | NM_011480   | 17<br>18                             | SREBP-1c Fw<br>SREBP-1c Rev                                                                                 | GGAGCCATGGATTGCACATT<br>GGCCCGGGAAGTCACTGT                                                                                                                                                         |
| <i>Srebf2</i>                     | NM_033218   | 19<br>20                             | SREBP-2 Fw<br>SREBP-2 Rev                                                                                   | GCGTTCTGGAGACCATGGA<br>ACAAAGTTGCTCTGAAAACAAATCA                                                                                                                                                   |
| <i>Abca1</i>                      | NM_013454   | 21<br>22                             | ABCA1 Fw<br>ABCA1 Rev                                                                                       | CGTTTCCGGGAAGTGTCTTA<br>GCTAGAGATGACAAGGAGGATGGA                                                                                                                                                   |
| <i>Fas</i>                        | NM_007988   | 23<br>24                             | FAS Fw<br>FAS Rev                                                                                           | GCTGCGGAACTTCAGGAAAT<br>AGAGACGTGTCACTCCTGGACTT                                                                                                                                                    |
| <i>Scd1</i>                       | NM_009127   | 25<br>26                             | SCD-1 Fw<br>SCD-1 Rev                                                                                       | CCGGAGACCCCTTAGATCGA<br>TAGCCTGTAAAAGATTCTGCAAACC                                                                                                                                                  |
| <i>Cypb</i>                       | NM_011149   | 27<br>28                             | CYCLO Fw<br>CYCLO Rev                                                                                       | TGGAGAGCACCAAGACAGACA<br>TGCCGGAGTCGACAATGAT                                                                                                                                                       |

## SUPPLEMENTARY FIGURE LEGENDS

**Supplementary Figure S1.** Effect of 25HC, cholesterol and desmosterol on the SREBP pathway in sterol deprived parental J774 cells. Cells were incubated in 2.5% LPDS supplemented with 1% HPCD, 2.5  $\mu$ M lovastatin and 0.1 mM mevalonate for 1 h. Then, cells were switched to the same medium but without HPCD. The rest of conditions were as those described in Figure 4. **(A)** Western blot analysis of SREBP-1 and SREBP-2 processing. **(B)** *Hmgcr*, *Ldlr* and *Insig1* mRNA levels. **(C)** Western blot analysis of HMG-CoA reductase and LDLR protein levels.

**Supplementary Figure S2.** Effect of 25HC, cholesterol and desmosterol on the SREBP pathway in sterol deprived L cells. L-cell mouse fibroblasts (ATCC CRL-2648) were maintained in low glucose (1  $\mu$ g/mL) DMEM (PAA) supplemented with 10% LPDS. For the experiments, cells were treated as indicated in Supplementary Figure 1. **(A)** Western blot analysis of SREBP-1 and SREBP-2 processing. **(B)** *Hmgcr*, *Ldlr* and *Insig1* mRNA levels. **(C)** Western blot analysis of HMG-CoA reductase and LDLR protein levels.

# Supplementary Figure S1

**A**

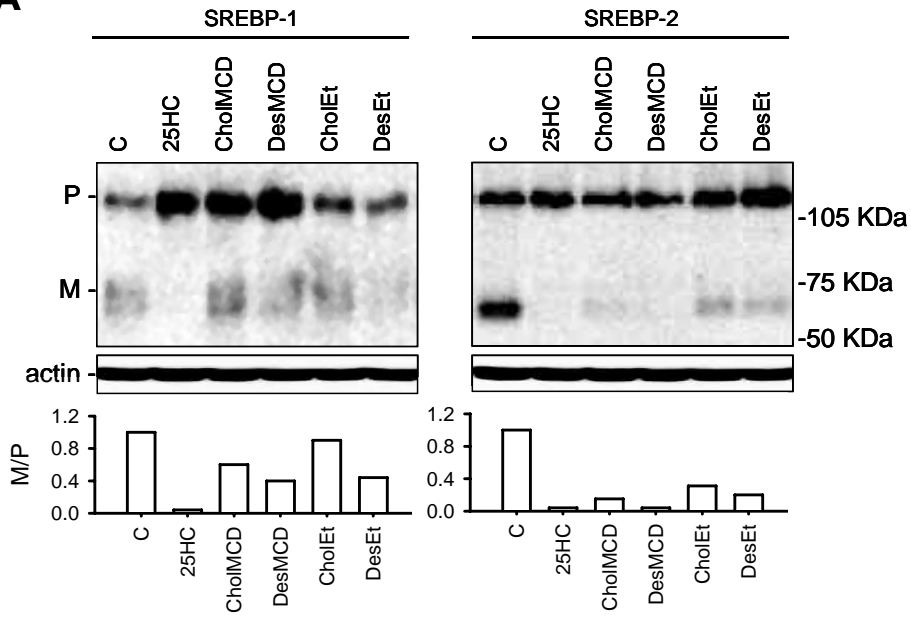

**B**

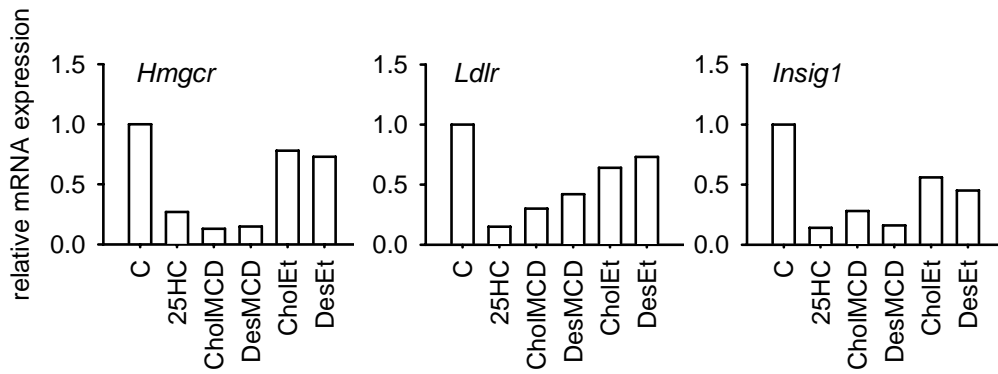

**C**

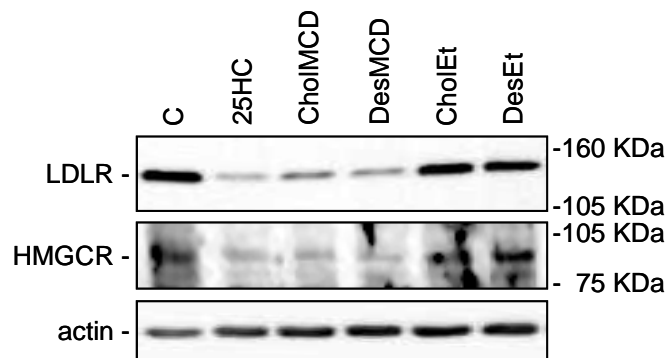

# Supplementary Figure S2

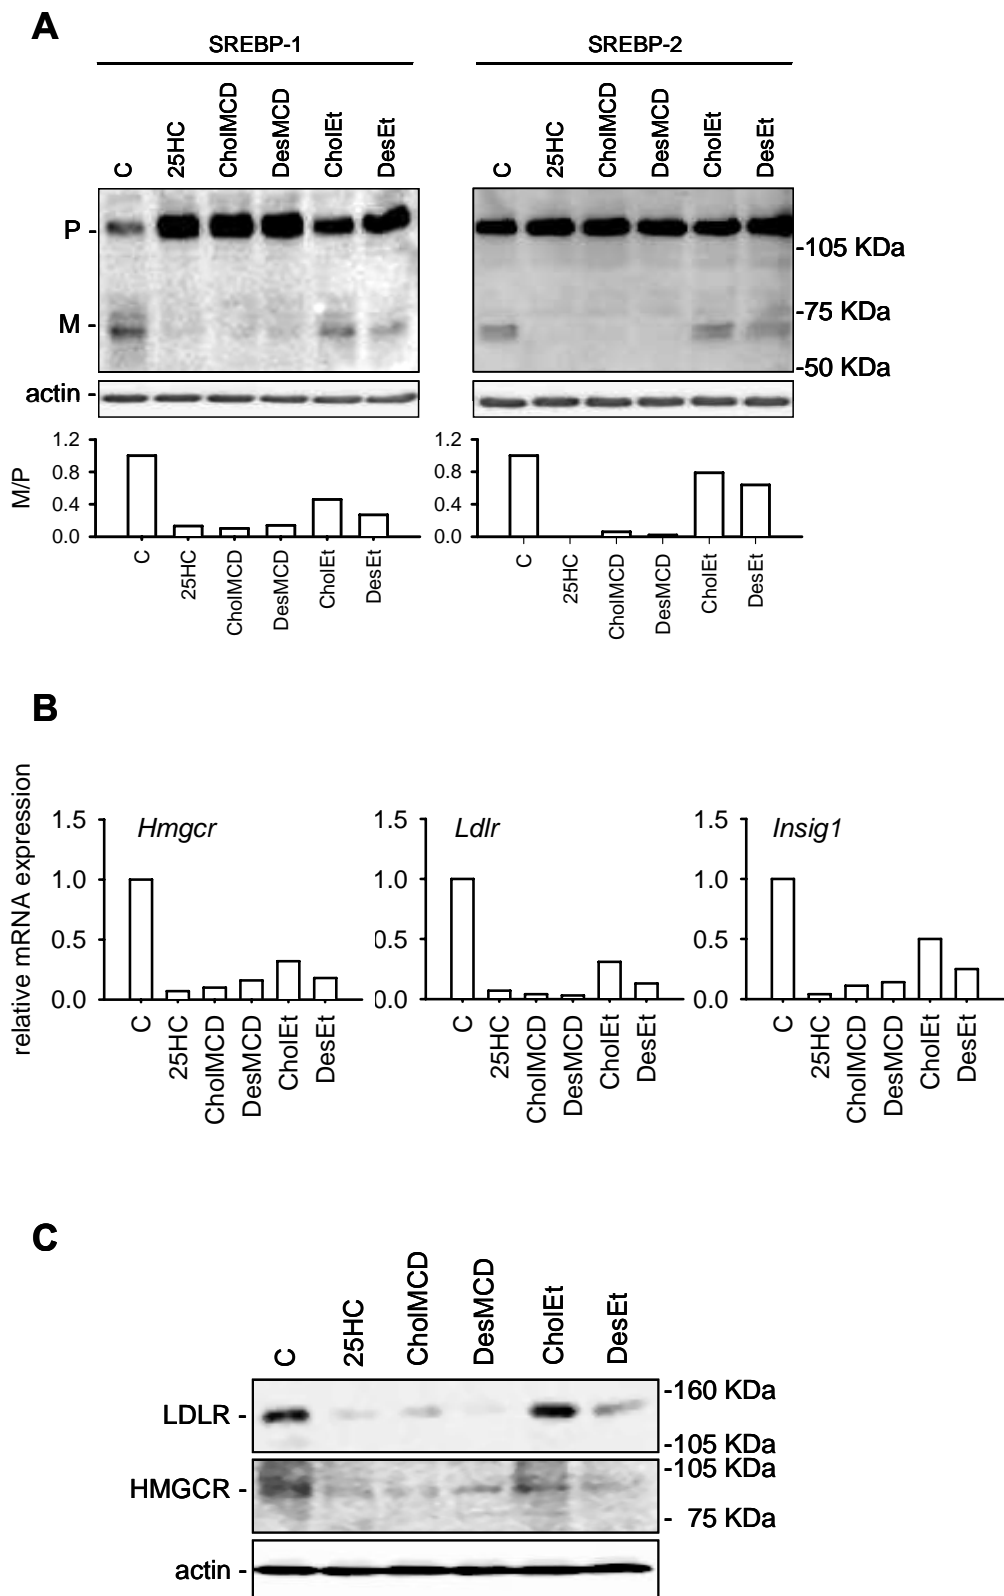

Supplement: NIHMS228489-supplement-1.pdf [file NIHMS228489-supplement-1.pdf]
